# Supplementary material for: Enhanced sensing performance of carbaryl pesticide by employing a MnO 2 /GO/e-Ag-based nanoplatform: role of graphene oxide as an adsorbing agent in the SERS analytical performance
Source: Royal Society of Chemistry journal article supplement (doi:10.1039/d3ra05381d), 2023-01-01
Supplement: d3ra05381d1.pdf [file d3ra05381d1.pdf]

Supporting Information for

**Enhanced Sensing Performance of Carbaryl Pesticide by employing  
MnO<sub>2</sub>/GO/e-Ag-based Nanoplatfrom: Role of Graphene Oxide as  
Adsorbing Agent on SERS Analytical Performance**

Dao Thi Nguyet Nga<sup>a,1</sup>, Quan Doan Mai<sup>a,1</sup>, Ha Anh Nguyen<sup>a,1</sup>, Nguyen Le Nhat Trang<sup>a</sup>,  
Pham Minh Khanh<sup>a</sup>, Nguyen Quang Hoa<sup>b</sup>, Vu Dinh Lam<sup>c</sup>, **Van-Tuan Hoang<sup>a,\*</sup>**,  
Anh-Tuan Le<sup>a,d</sup>

<sup>a</sup>*Phenikaa University Nano Institute (PHENA), Phenikaa University, Hanoi 12116, Vietnam*

<sup>b</sup>*Faculty of Physics, VNU University of Science, Vietnam National University, Hanoi, 334  
Nguyen Trai, Thanh Xuan, Hanoi, Viet Nam*

<sup>c</sup>*Institute of Materials Science (IMS) and Graduate University of Science and Technology  
(GUST), Vietnam Academy of Science and Technology, 18 Hoang Quoc Viet, Hanoi 10000,  
Vietnam*

<sup>d</sup>*Faculty of Materials Science and Engineering (MSE), Phenikaa University, Hanoi 12116,  
Vietnam*

Corresponding authors:

[\\*tuan.hoangvan@phenikaa-uni.edu.vn](mailto:*tuan.hoangvan@phenikaa-uni.edu.vn) (H.V. Tuan)

<sup>1</sup> D.T.N. Nga, M.Q. Doan and N.H. Anh contributed equally to this work

### Calculation of limit of detection (LOD)

The standard curve of linear detecting range was given as:

$$Y = A + B \times \text{Log}(X) \quad (1)$$

where A and B are intercept and slope of regression equation obtained through the plot of the logarithmic SERS intensity (Y) – logarithmic concentration (X).

The LOD is calculated using the following equation <sup>1</sup>:

$$LOD = 10^{[(Y_{blank} + 3SD)/Y_{blank} - A]/B} \quad (2)$$

where  $Y_{blank}$  and SD are the SERS signal and the standard deviation of blank sample, respectively.

SD is calculated via the well-known formula:

$$SD = \sqrt{\frac{1}{n-1} \times \sum_i^n (x_i - x_{average})^2} \quad (3)$$

where  $x_i$  if the “i” sample of the series of measurements,  $x_{average}$  is the average value of SERS signal obtained from the blank sample repeated n times.

### Calculation of relative standard deviation (RSD)

The RSD value of repeatability and reproducibility is calculated via the well-known formula:

$$RSD = \frac{SD \times 100}{x_{average}} \quad (4)$$

where SD is the standard deviation that calculates using equation 4 and  $x_{average}$  is the average value of SERS signal obtained from each measurement.

### Calculation of enhancement factor (EF)

The EF value is calculated according to the well-established equation, which was employed in several published studies <sup>2,3</sup>:

$$EF = \frac{I_{SERS}}{I_{Raman}} \times \frac{N_{bulk}}{N_{surface}} \quad (5)$$

where  $I_{SERS}$  and  $I_{Raman}$  are Raman signal intensity of the analyte with and without SERS from the substrate, respectively; and  $N_{bulk}$  is the number of analyte molecules that are probed on the Raman spectrum, while  $N_{surface}$  is the number of analyte molecules probed using SERS.

$N_{bulk}$  can be calculated following:

$$N_{bulk} = \frac{A_{laser} \times h \times \rho}{M} \times N_A \quad (6)$$

where  $A_{laser}$ ,  $h$ ,  $\rho$  and  $m$  are the laser spot area, the focal length, the density of the solid analyte and its molecular weight, respectively; and  $N_A$  is the Avogadro number.

$N_{surface}$  can be expressed as:

$$N_{surface} = \frac{C \times V}{A_{substrate}} \times N_A \times A_{laser} \quad (7)$$

where  $C$ ,  $V$ ,  $A_{substrate}$  are the concentration, the volume drop-casted of the analyte, and the area of the substrate, respectively;  $N_A$  is the Avogadro number; and  $A_{laser}$  is the laser spot area.

Thus, EF can be calculated as:

$$EF = \frac{I_{SERS}}{I_{Raman}} \times \frac{N_{bulk}}{N_{surface}} = \frac{I_{SERS}}{I_{Raman}} \times \frac{h \times \rho \times A_{substrate}}{M \times C \times V} \quad (8)$$

In our case,  $I_{\text{SERS}}$  and  $I_{\text{Raman}}$  is Raman signal intensity with and without SERS substrate of Carbaryl ( $480 \text{ cm}^{-1}$ ),  $h = 2 \text{ }\mu\text{m} = 2 \times 10^{-4} \text{ cm}$ ,  $\rho = 1.2 \text{ g/cm}^3$ ,  $M = 201.22 \text{ g/mol}$ ,  $A_{\text{substrate}} = 4 \pi \text{ mm}^2 = 4 \pi \times 10^{-2} \text{ cm}^2$ ,  $C = 10^{-7} \text{ mol/L}$ ,  $V = 5 \text{ }\mu\text{L} = 5 \times 10^{-6} \text{ L}$ .

$I_{\text{SERS}}$  and  $I_{\text{Raman}}$  values of e-AgNPs and  $\text{MnO}_2/\text{GO} 0.1\%/\text{e-Ag}$  were estimated using the spectra in Figure S5.

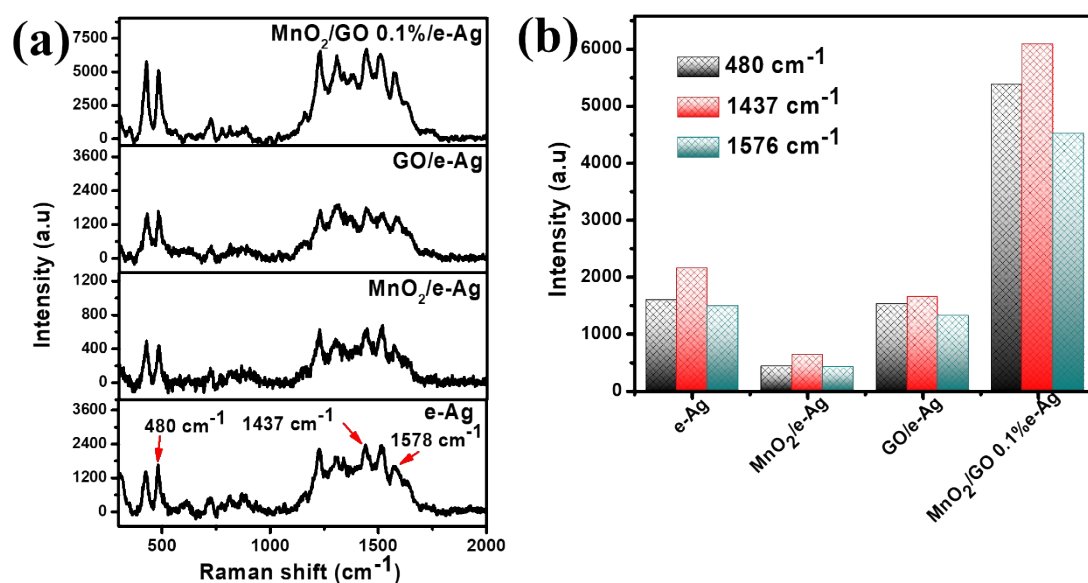

**Figure S1:** (a) SERS spectra of CBR ( $10^{-3} \text{ M}$ ) on e-AgNPs,  $\text{MnO}_2/\text{e-Ag}$ ,  $\text{GO}/\text{e-Ag}$ , and  $\text{MnO}_2/\text{e-Ag}$  nanocomposites. (b) SERS intensities of MB ( $10^{-5} \text{ M}$ ) at  $480 \text{ cm}^{-1}$ ,  $1437 \text{ cm}^{-1}$ , and  $1576 \text{ cm}^{-1}$  on e-AgNPs,  $\text{MnO}_2/\text{e-Ag}$ ,  $\text{GO}/\text{e-Ag}$ , and  $\text{MnO}_2/\text{e-Ag}$  nanocomposites.

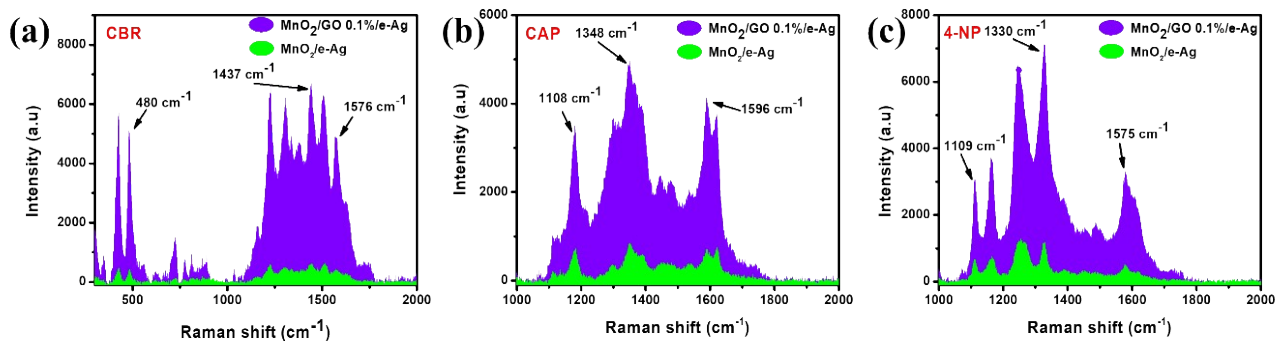

*Figure S2: SERS intensities of (a) CBR ( $10^{-3}$  M), (b) CAP ( $10^{-3}$  M), and (c) 4-NP ( $10^{-3}$  M) at characteristic peaks on MnO<sub>2</sub>/e-Ag, and MnO<sub>2</sub>/GO 0.1 wt%/e-Ag nanocomposites.*

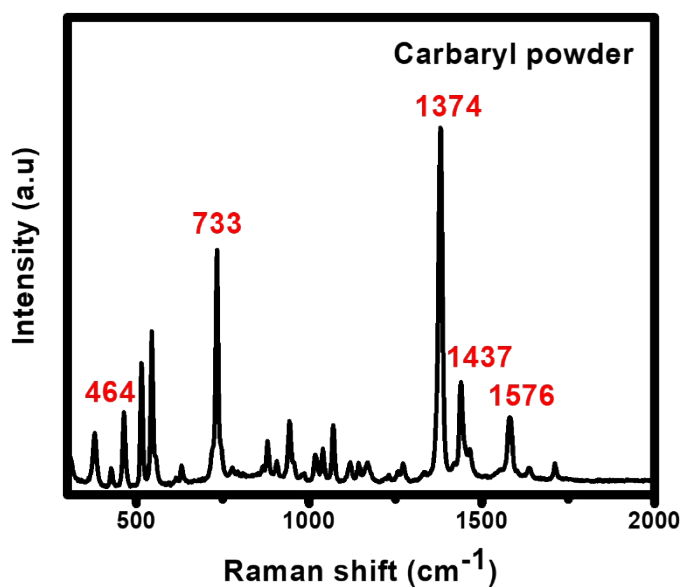

*Figure S3: Raman spectrum of Carbaryl.*

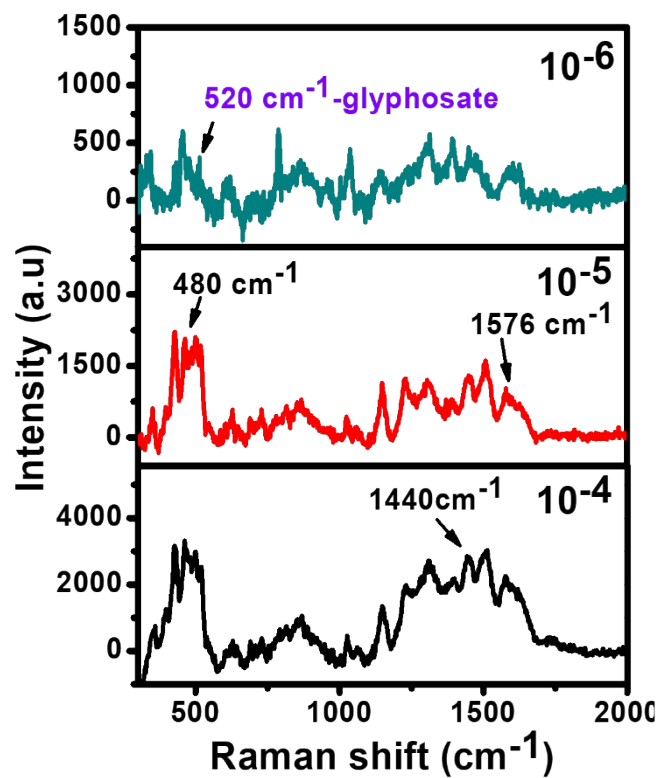

*Figure S4: SERS spectra of the mixture of Carbaryl, 4-Nitrophenol, and Glyphosate ( $10^{-4}$  M –  $10^{-6}$  M) in the real sample of the cucumber on the  $\text{MnO}_2/\text{GO}$  0.01 wt%/e-Ag substrate.*

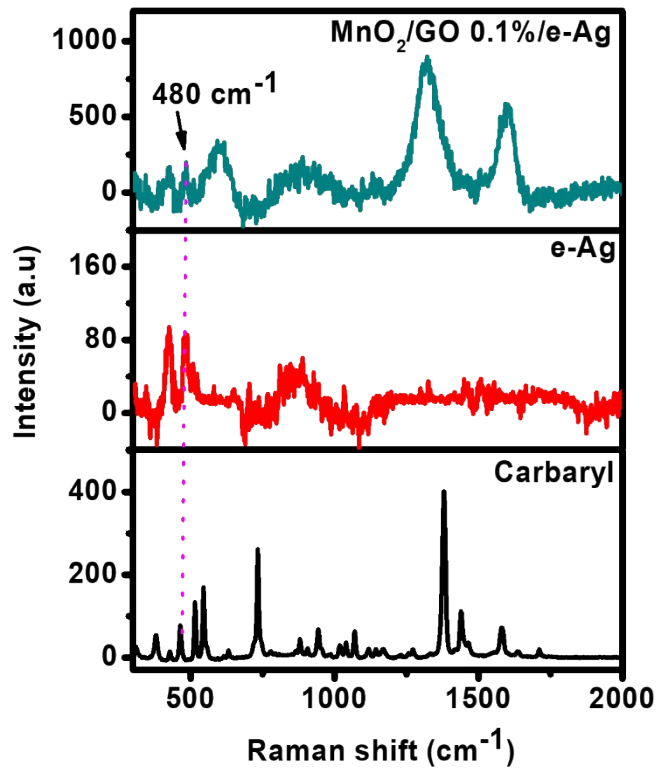

**Figure S5:** Raman of CBR; and SERS spectrum of  $e\text{-Ag}$  and  $\text{MnO}_2/\text{GO } 0.1 \text{ wt}\%/e\text{-Ag}$  for CBR ( $10^{-7} \text{ M}$ ).

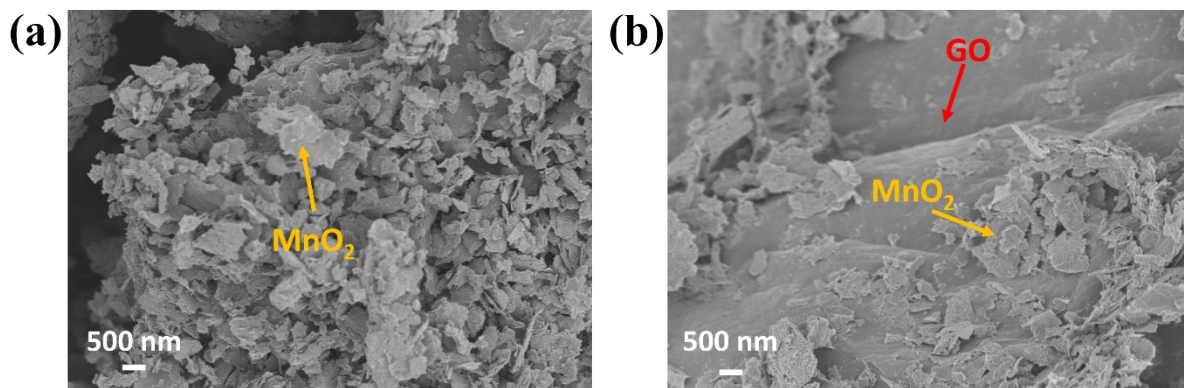

**Figure S6:** SEM images of  $\text{MnO}_2/\text{GO}$  with GO contents of (a) 0.1 wt% (to become 0.4 wt% in  $\text{MnO}_2/\text{GO}/e\text{-Ag}$ ) and (b) 0.5 wt% (to become 2.0 wt% in  $\text{MnO}_2/\text{GO}/e\text{-Ag}$ ).

**Table S1: Molecular structure and assignments of vibrational bands in Raman and SERS spectra of some chemicals.**

|                     | Group 1                                                                                                                                                                           |                                                                                                                                                                                  | Group 2                                                                                                                                                                     |                                                                                                                                                                               |                                                                                                                                                                 |
|---------------------|-----------------------------------------------------------------------------------------------------------------------------------------------------------------------------------|----------------------------------------------------------------------------------------------------------------------------------------------------------------------------------|-----------------------------------------------------------------------------------------------------------------------------------------------------------------------------|-------------------------------------------------------------------------------------------------------------------------------------------------------------------------------|-----------------------------------------------------------------------------------------------------------------------------------------------------------------|
|                     | TCZ                                                                                                                                                                               | MB                                                                                                                                                                               | CBR                                                                                                                                                                         | CAP                                                                                                                                                                           | 4-NP                                                                                                                                                            |
| Molecular structure | 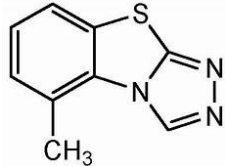                                                                                                 |                                                                                                |                                                                                          |                                                                                            |                                                                              |
| Vibrational band    | <p>(1) 431 cm<sup>-1</sup>: C-N-C deformation vibration</p> <p>(2) 595 cm<sup>-1</sup>: C-S-C deformation vibration</p> <p>(3) 1372 cm<sup>-1</sup>: C-N stretching vibration</p> | <p>(1) 453 cm<sup>-1</sup>: C-N-C skeletal deformation mode</p> <p>(2) 1397 cm<sup>-1</sup>: C-N symmetrical stretching</p> <p>(3) 1622 cm<sup>-1</sup>: C-C ring stretching</p> | <p>(1) 480 cm<sup>-1</sup>: C-C bending mode</p> <p>(2) 1437 cm<sup>-1</sup>: C-H wagging mode</p> <p>(3) 1576 cm<sup>-1</sup>: C=C stretching mode in naphthalene ring</p> | <p>(1) 1108 cm<sup>-1</sup>: Ring in-plane bending</p> <p>(2) 1348 cm<sup>-1</sup>: N-O<sub>2</sub> symmetric stretching</p> <p>(3) 1596 cm<sup>-1</sup>: Ring stretching</p> | <p>(1) 1109 cm<sup>-1</sup>: C-H ip bend</p> <p>(2) 1330 cm<sup>-1</sup>: NO<sub>2</sub> symmetric stretching</p> <p>(3) 1575 cm<sup>-1</sup>: Ring stretch</p> |



**Table S2: The recovery values for four concentrations of CBR in the tap-water and cucumber samples.**

| Real sample | Analyte | Concentration of CBR (M) | Recovery (%) | RSD (%) |
|-------------|---------|--------------------------|--------------|---------|
| Tap-water   | CBR     | $10^{-4}$                | 106.98       | 9.70    |
|             |         | $10^{-5}$                | 95.47        | 11.18   |
|             |         | $10^{-6}$                | 89.44        | 11.03   |
|             |         | $10^{-7}$                | 84.65        | 13.46   |
| Cucumber    | CBR     | $10^{-4}$                | 111.64       | 13.57   |
|             |         | $10^{-5}$                | 98.23        | 12.27   |
|             |         | $10^{-6}$                | 93.12        | 7.42    |
|             |         | $10^{-7}$                | 87.61        | 9.34    |

**Table S3: The recovery values for three concentrations of CBR in the cucumber samples containing extra-two pesticides (4-nitrophenol and glyphosate).**

| Real sample | Analyte | Concentration of CBR (M) | Recovery (%) | RSD (%) |
|-------------|---------|--------------------------|--------------|---------|
| Cucumber    | CBR     | $10^{-4}$                | 109.86       | 11.54   |
|             |         | $10^{-5}$                | 93.75        | 14.52   |
|             |         | $10^{-6}$                | 98.39        | 13.49   |

## References

- (1) Chen, R.; Shi, H.; Meng, X.; Su, Y.; Wang, H.; He, Y. Dual-Amplification Strategy-Based SERS Chip for Sensitive and Reproducible Detection of DNA Methyltransferase Activity in Human Serum. *Anal. Chem.* **2019**, *91* (5), 3597–3603. <https://doi.org/10.1021/acs.analchem.8b05595>.
- (2) Le Ru, E.C.; Blackie, E.; Meyer, M.; Etchegoin, P.G. Surface Enhanced Raman Scattering Enhancement Factors: A Comprehensive Study. *J. Phys. Chem. C*, 2007, **111**, 33, 13794-13803. <https://doi.org/10.1021/jp0687908>.
- (3) Fu, W. L.; Zhen, S. J.; Huang, C. Z; One-pot green synthesis of graphene oxide/gold nanocomposites as SERS substrates for malachite green detection. *Analyst*, 2013, **138**, 3075-3081. <https://doi.org/10.1039/C3AN00018D>.
